# Supplementary material for: Lanthanide-based coordination polymers as promising heterogeneous catalysts for ring-opening reactions
Source: Royal Society of Chemistry journal article supplement (doi:10.1039/c5ra26283f), 2016-01-01
Supplement: c5ra26283f1.pdf [file c5ra26283f1.pdf]

**Electronic Supplementary Information**  
**For the**  
**Manuscript Entitled**

**Lanthanide-based coordination polymers as the promising  
heterogeneous catalysts for ring-opening reactions**

**Gulshan Kumar, Girijesh Kumar, and Rajeev Gupta\***

**Department of Chemistry, University of Delhi**

**Delhi – 110 007, India**

### List of Figures:

Figure S1. FTIR spectrum of **1-Eu**.

Figure S2. FTIR spectrum of **1-Tb**.

Figure S3. Thermal Gravimetric Analysis (TGA, red trace) and Differential scanning calorimetric (DSC, blue trace) plots for **1-Eu**.

Figure S4. Thermal Gravimetric Analysis (TGA, red trace) and Differential scanning calorimetric (DSC, blue trace) plots for **1-Tb**.

Figure S5. Diffuse reflectance UV-Vis spectrum of **1-Eu**.

Figure S6. Diffuse reflectance UV-Vis spectrum of **1-Tb**.

Figure S7. X-ray Powder Diffraction (XRPD) pattern for as synthesized **1-Eu** (red trace) and the one simulated from the Mercury 3.0 using single crystal data (blue trace).

Figure S8. X-ray Powder Diffraction (XRPD) pattern for as synthesized **1-Tb** (red Trace) and the one simulated from the Mercury 3.0 using single crystal data (blue trace).

Figure S9. A view of 2D network created due to various hydrogen bonding interactions involving free arylcarboxylic acid groups, O<sub>amide</sub> groups, and coordinated as well as lattice water molecules connecting various 1D chains (shown in green, magenta, and red colours) in the crystal structure of **1-Tb**.

Figure S10. FTIR spectra of as synthesized **1-Eu** (red trace) and after catalysis (blue trace).

Figure S11. FTIR spectra of as synthesized **1-Tb** (red trace) and after catalysis (blue trace).

Figure S12. X-ray Powder Diffraction (XRPD) pattern for as synthesized **1-Eu** before catalysis (red Trace) and after catalysis (blue trace).

Figure S13. X-ray Powder Diffraction (XRPD) pattern for as synthesized **1-Tb** before catalysis (red Trace) and after catalysis (blue trace)

Figure S14. FTIR spectra of as-synthesized **1-Eu** (red trace) and after D<sub>2</sub>O exchange experiment (blue trace).

Figure S15. FTIR spectra of as-synthesized **1-Tb** (red trace) and after D<sub>2</sub>O exchange experiment (blue trace).

Figures S16 – S31. <sup>1</sup>H and <sup>13</sup>C NMR spectra of representative organic products.

### List of Tables:

Table S1. H-bonding distances for **1-Eu**.

Table S2. H-bonding distances for **1-Tb**.

Table S3. Retention time of the organic products as observed from the gas chromatographic experiments.<sup>a</sup>

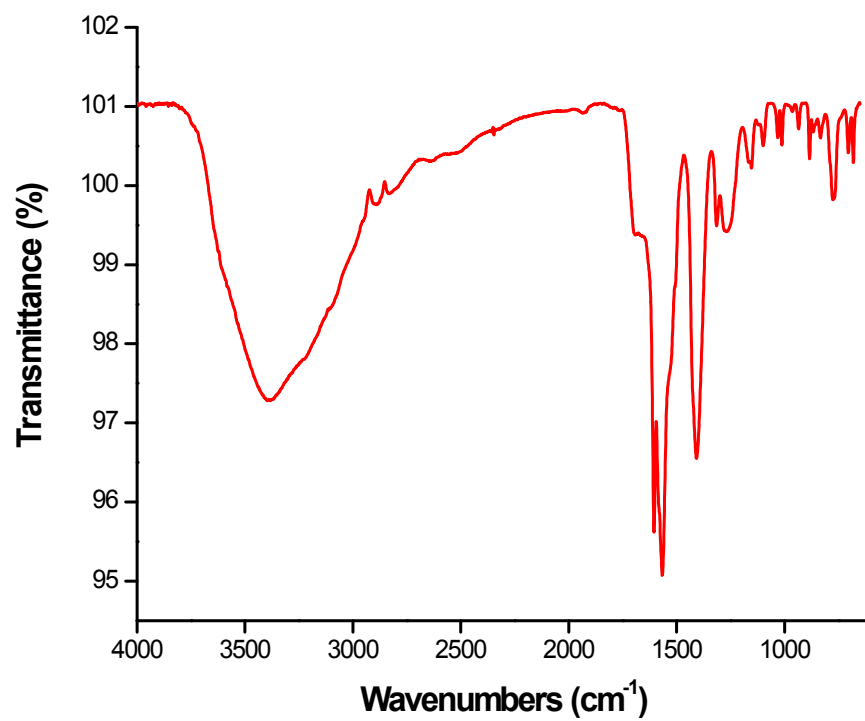

Figure S1. FTIR spectrum of **1-Eu**.

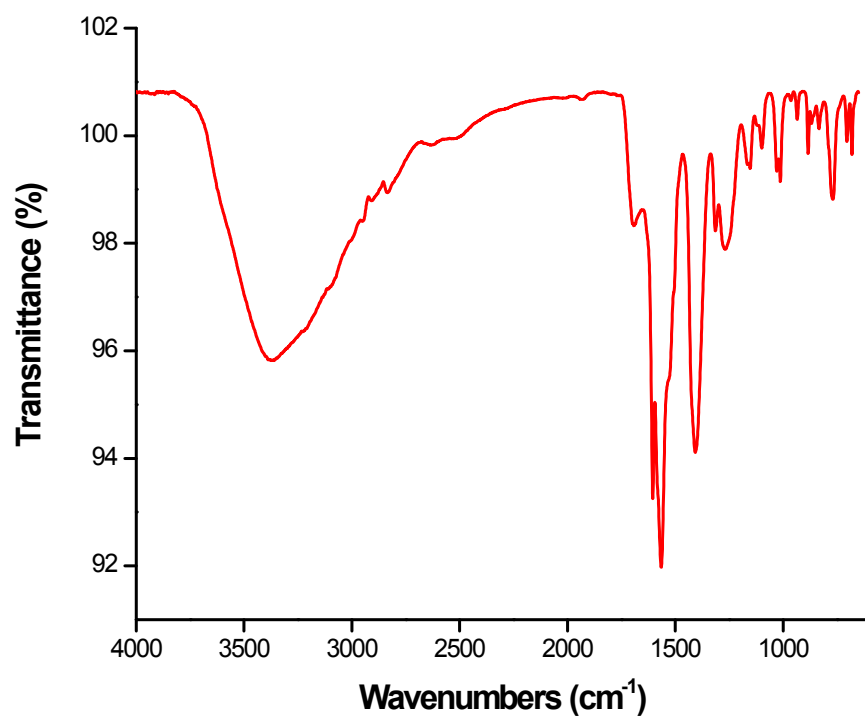

Figure S2. FTIR spectrum of **1-Tb**.

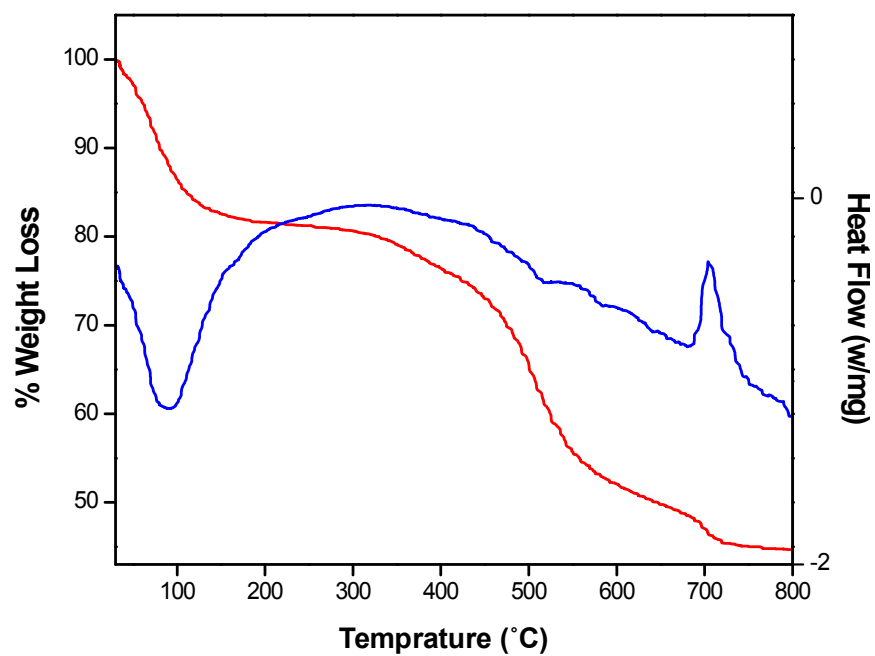

Figure S3. Thermal Gravimetric Analysis (TGA, red trace) and Differential Scanning Calorimetric (DSC, blue trace) plots for **1-Eu**.

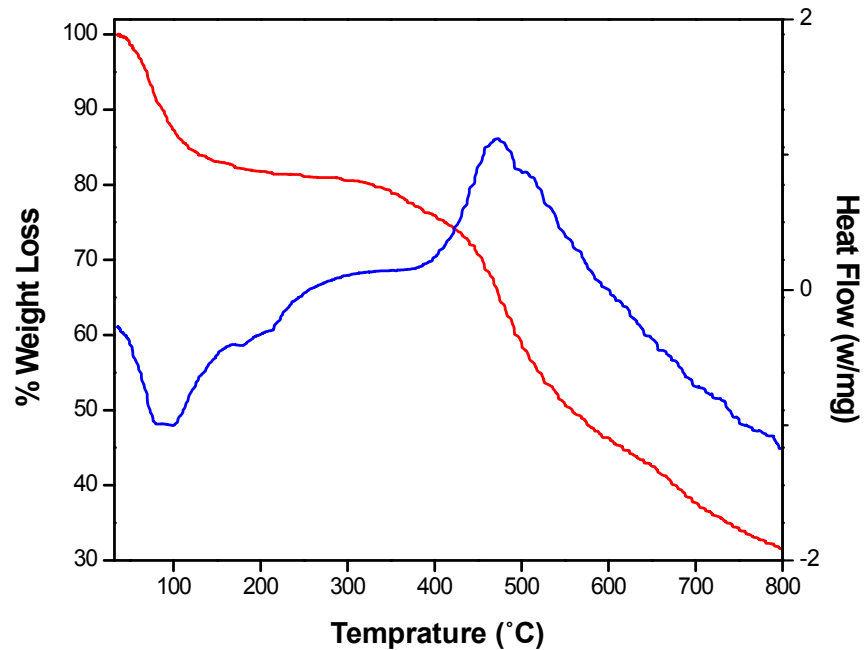

Figure S4. Thermal Gravimetric Analysis (TGA, red trace) and Differential Scanning Calorimetric (DSC, blue trace) plots for **1-Tb**.

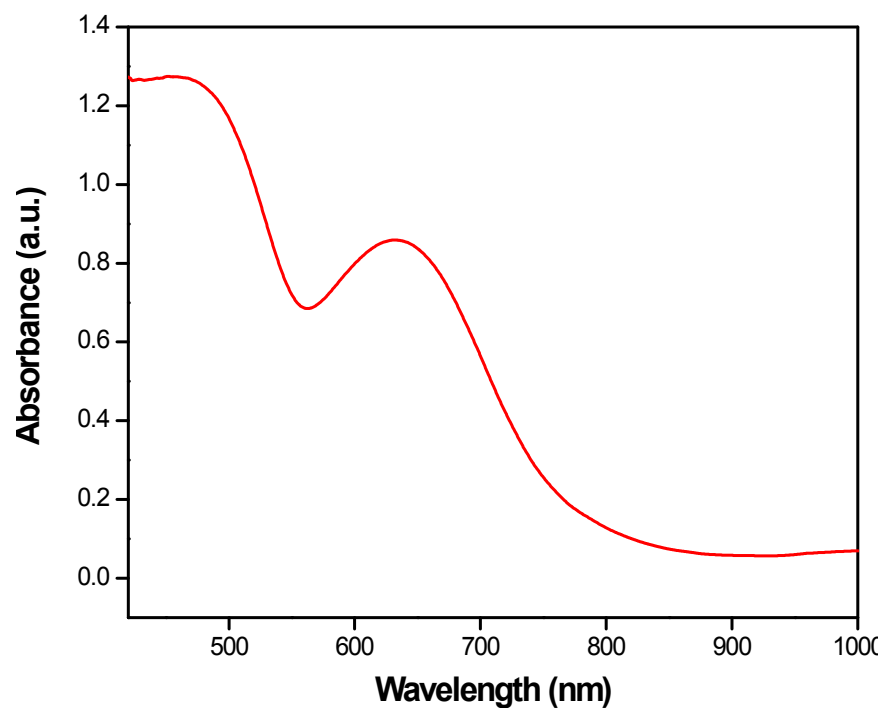

Figure S5. Diffuse reflectance UV-Vis spectrum of **1-Eu**.

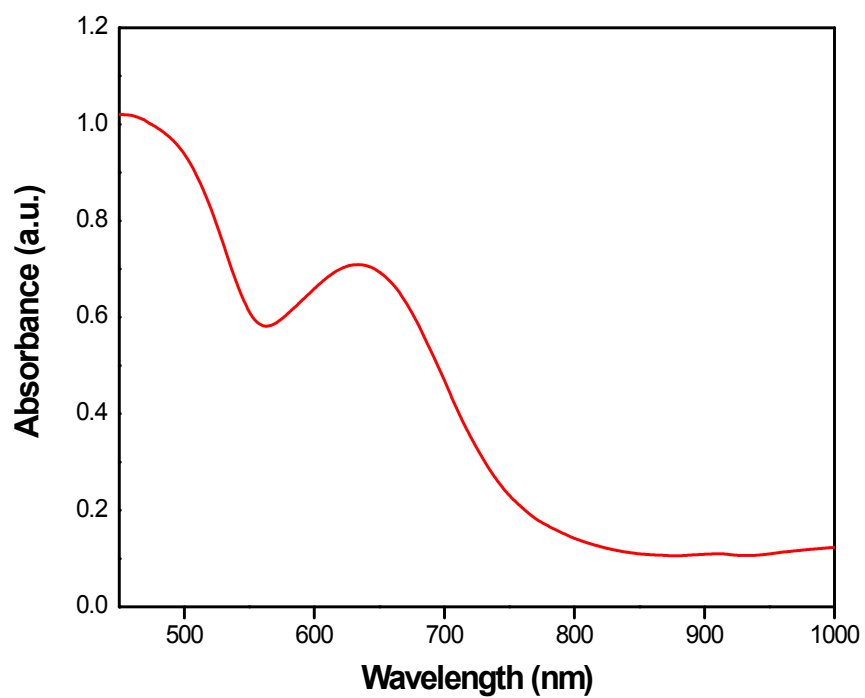

Figure S6. Diffuse reflectance UV-Vis spectrum of **1-Tb**.

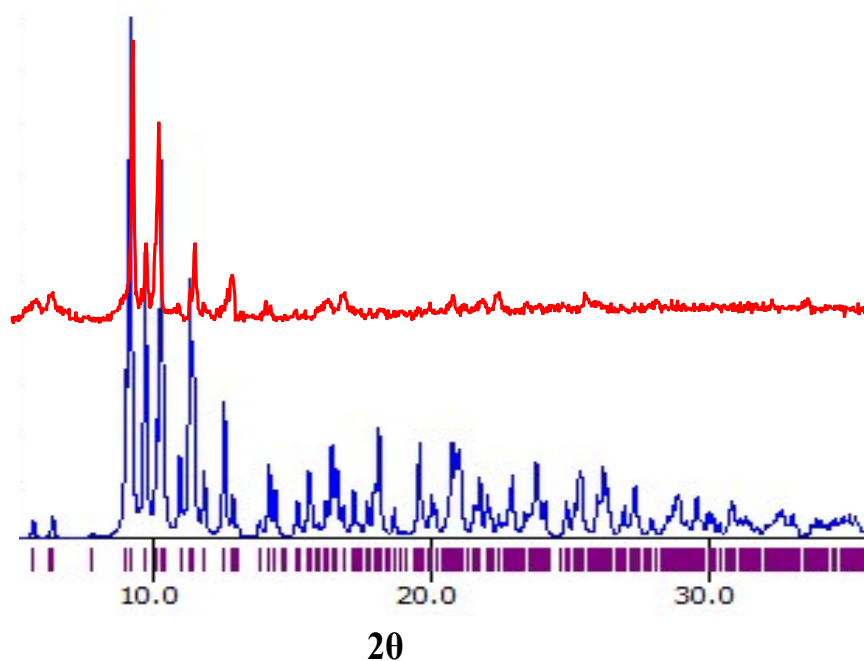

Figure S7. X-ray Powder Diffraction (XRPD) pattern for as synthesized **1-Eu** (red trace) and the one simulated from the Mercury 3.0 using single crystal data (blue trace).

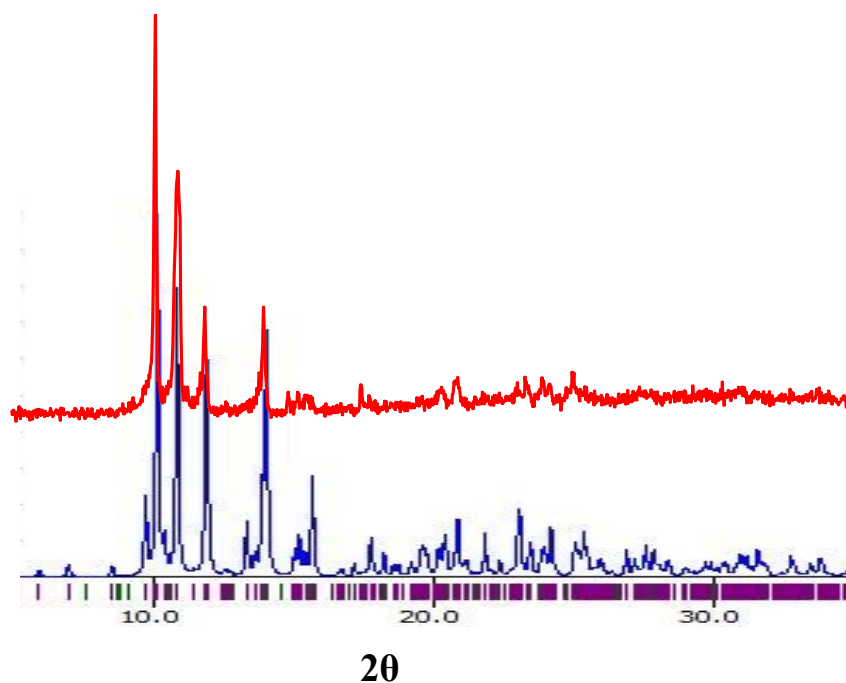

Figure S8. X-ray Powder Diffraction (XRPD) pattern for as synthesized **1-Tb** (red trace) and the one simulated from the Mercury 3.0 using single crystal data (blue trace).

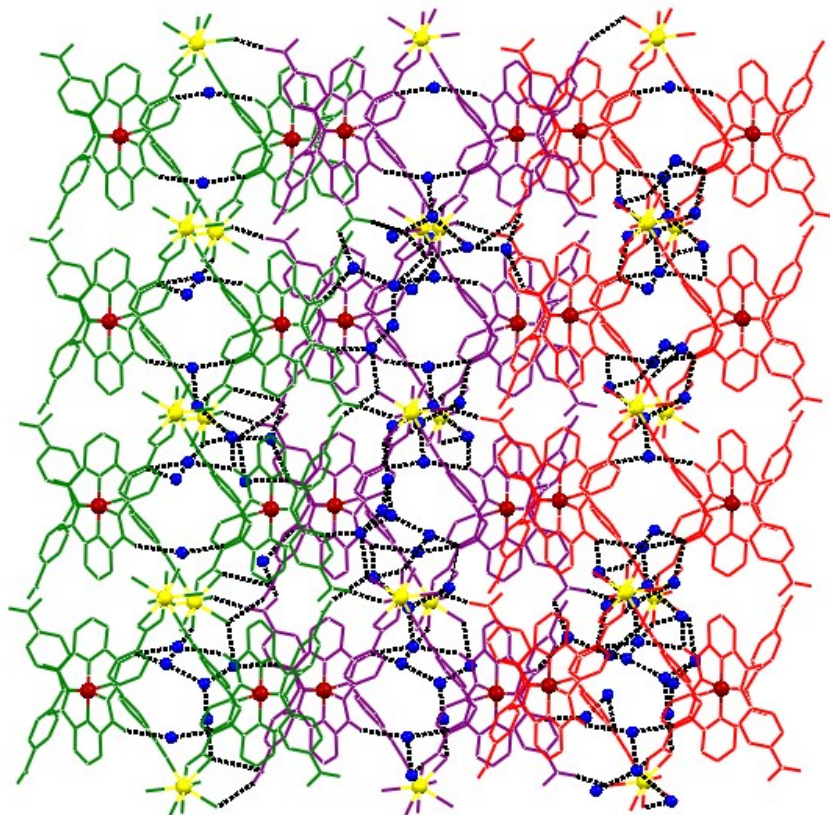

Figure S9. A view of 2D network created due to various hydrogen bonding interactions involving free arylcarboxylic acid groups,  $O_{\text{amide}}$  groups, and coordinated as well as lattice water molecules connecting various 1D chains (shown in green, magenta, and red colours) in the crystal structure of **1-Tb**.

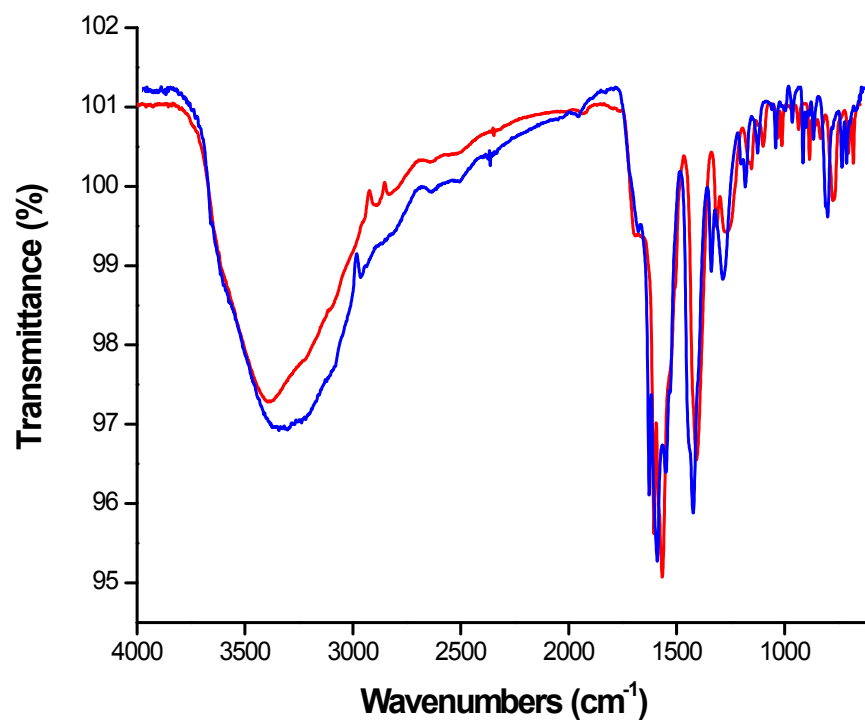

Figure S10. FTIR spectra of as synthesized **1-Eu** (red trace) and after catalysis (blue trace).

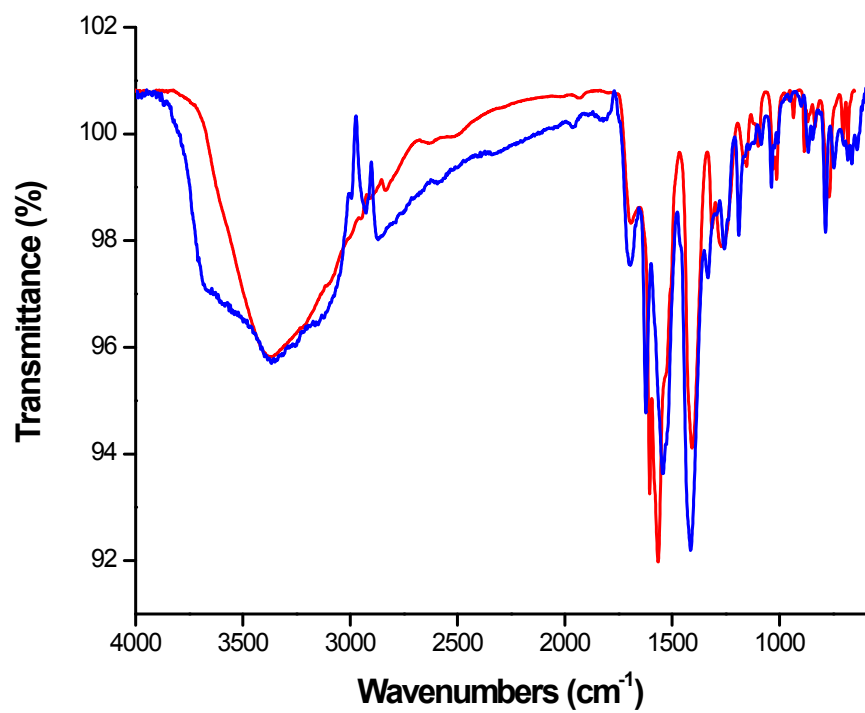

Figure S11. FTIR spectra of as synthesized **1-Tb** (red trace) and after catalysis (blue trace).

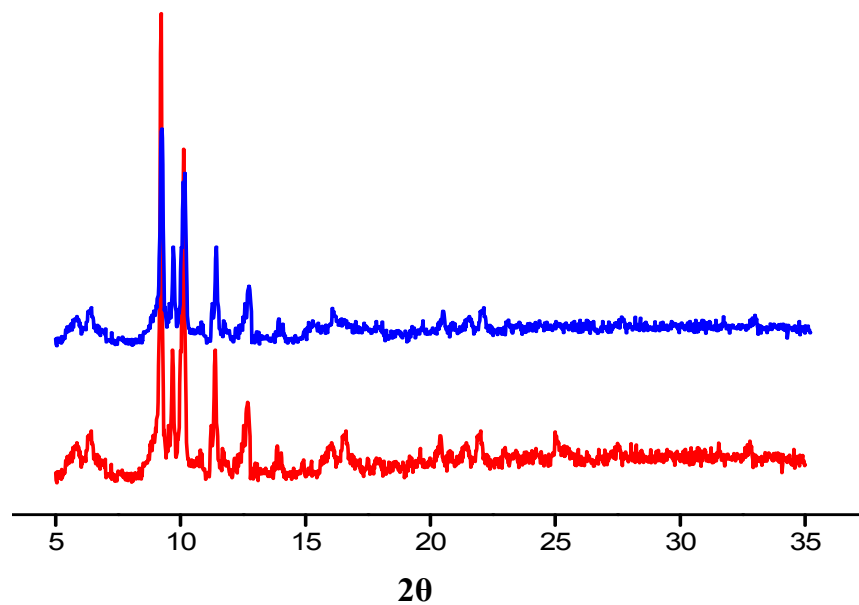

Figure S12. X-ray Powder Diffraction (XRPD) pattern for as synthesized **1-Eu** before (red Trace) and after (blue trace) the ROR between styrene oxide and aniline.

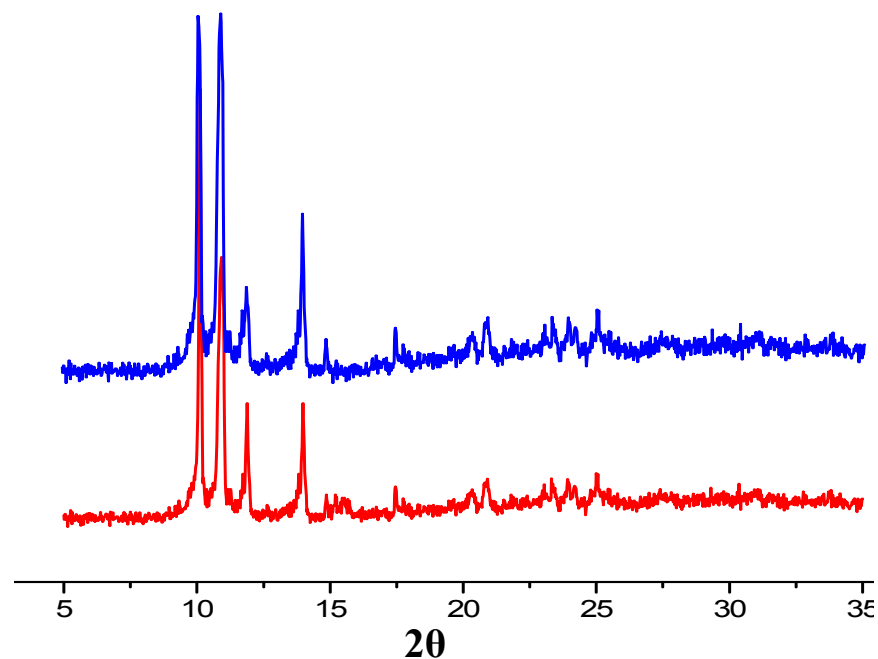

Figure S13. X-ray Powder Diffraction (XRPD) pattern for as synthesized **1-Tb** before (red Trace) and after (blue trace) the ROR between styrene oxide and aniline.

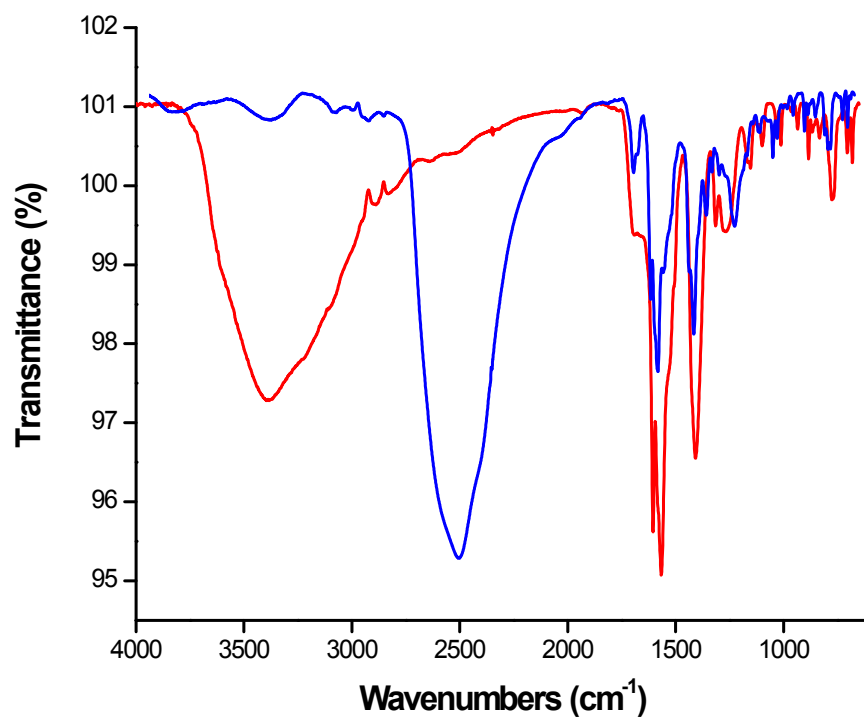

Figure S14. FTIR spectra of as-synthesized **1-Eu** (red trace) and after  $\text{D}_2\text{O}$  exchange experiment (blue trace).

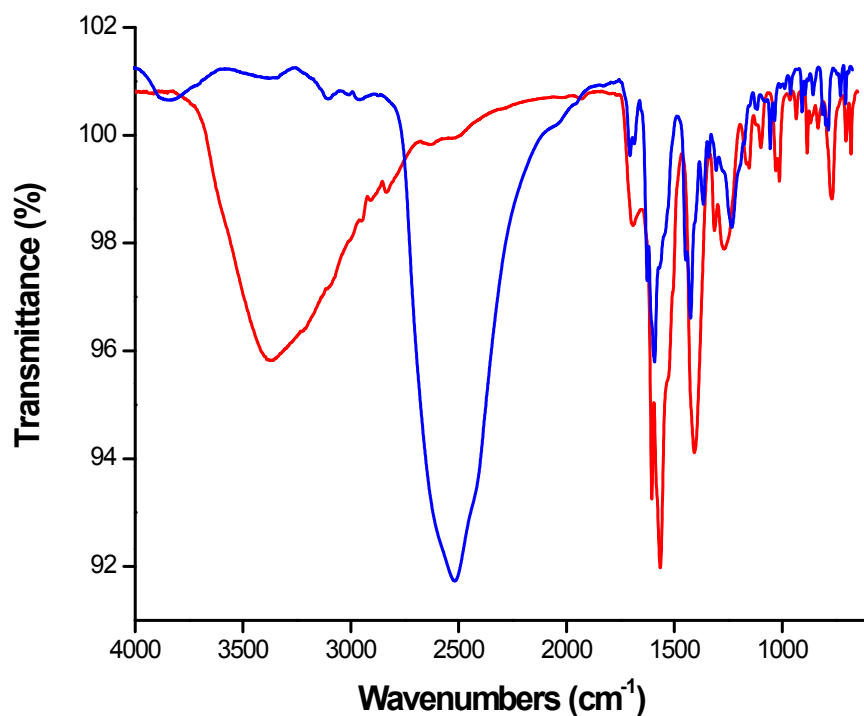

Figure S15. FTIR spectra of as-synthesized **1-Tb** (red trace) and after  $\text{D}_2\text{O}$  exchange experiment (blue trace).

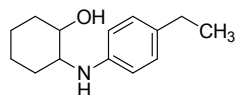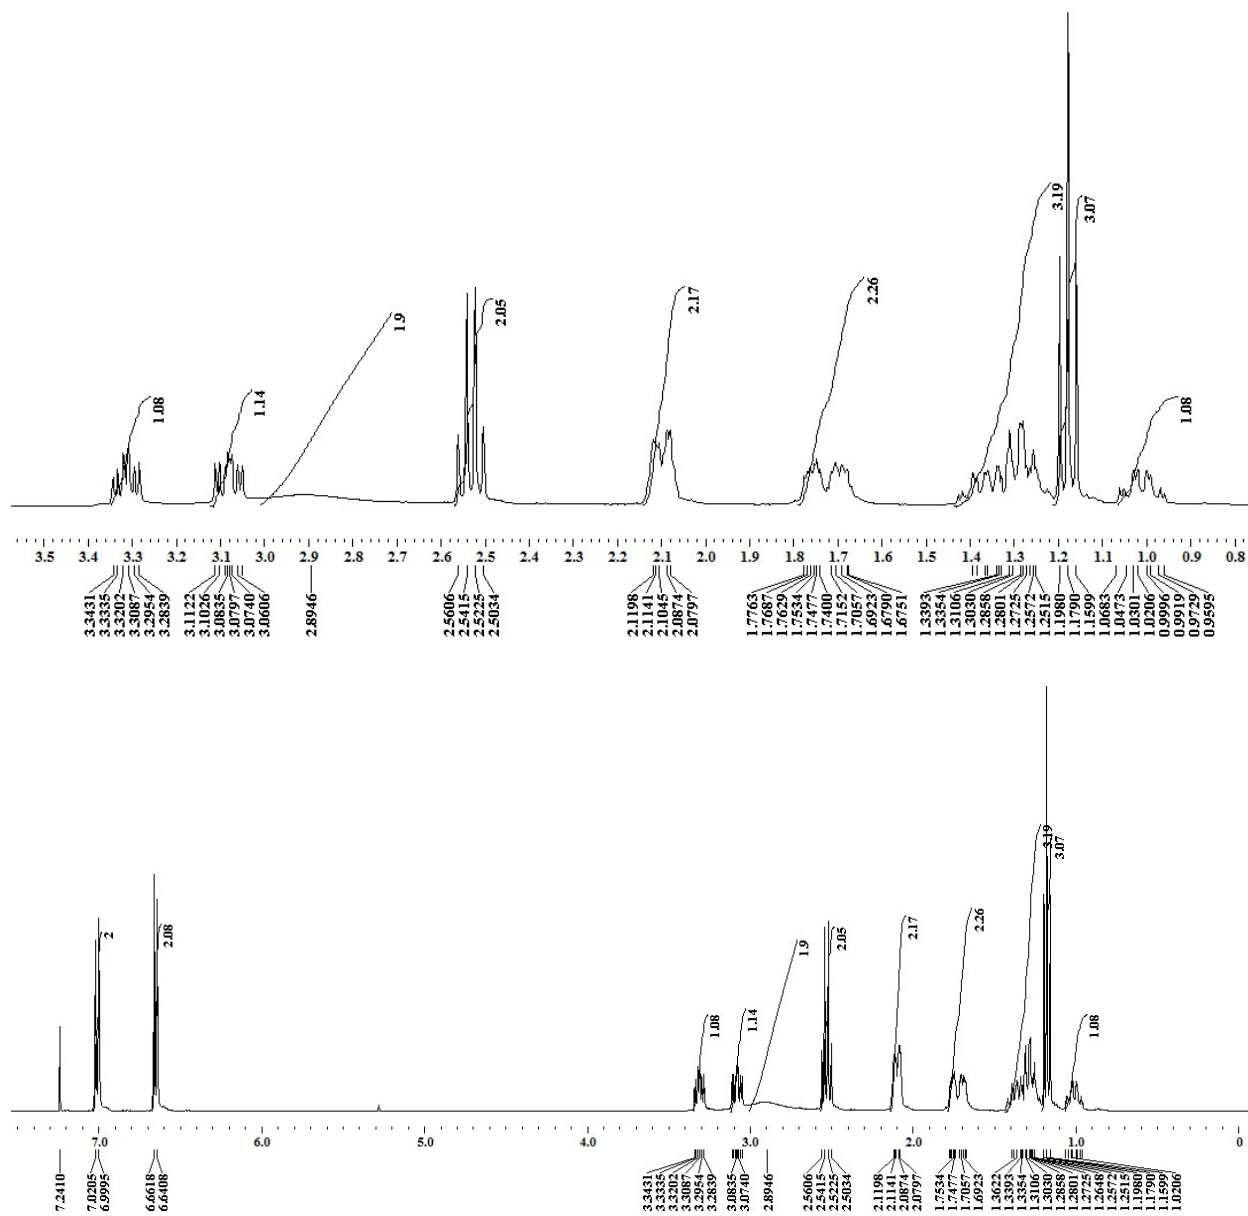

Figure S16. <sup>1</sup>H NMR spectrum of 2-((4-Ethylphenyl)amino)cyclohexanol in CDCl<sub>3</sub>.

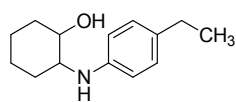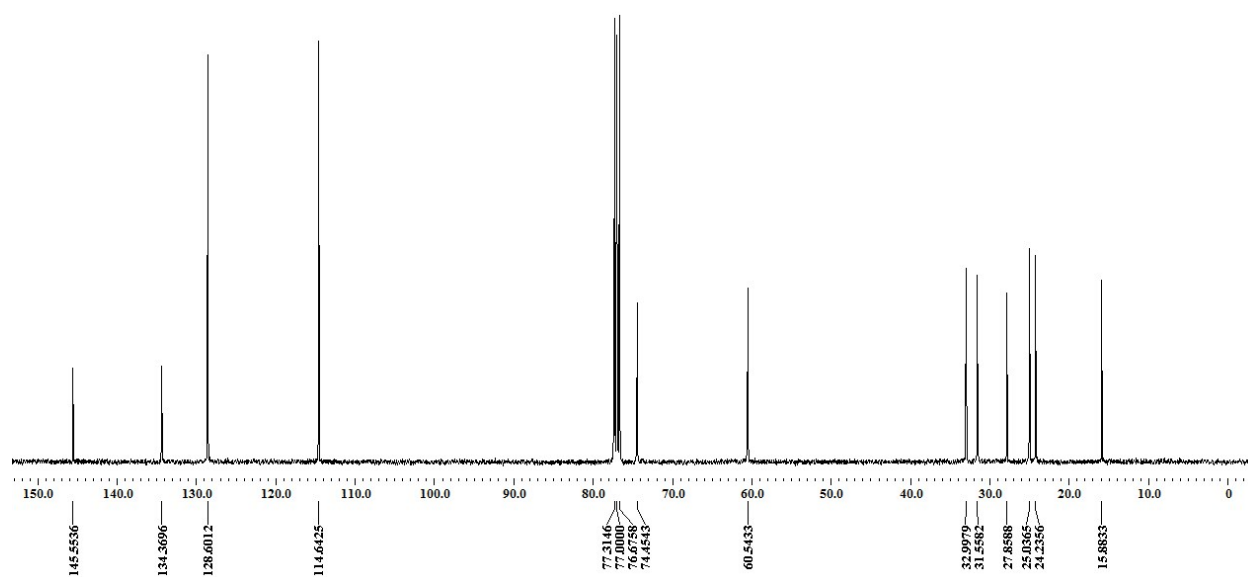

Figure S17. <sup>13</sup>C NMR spectrum of 2-((4-Ethylphenyl)amino)cyclohexanol in CDCl<sub>3</sub>.

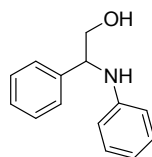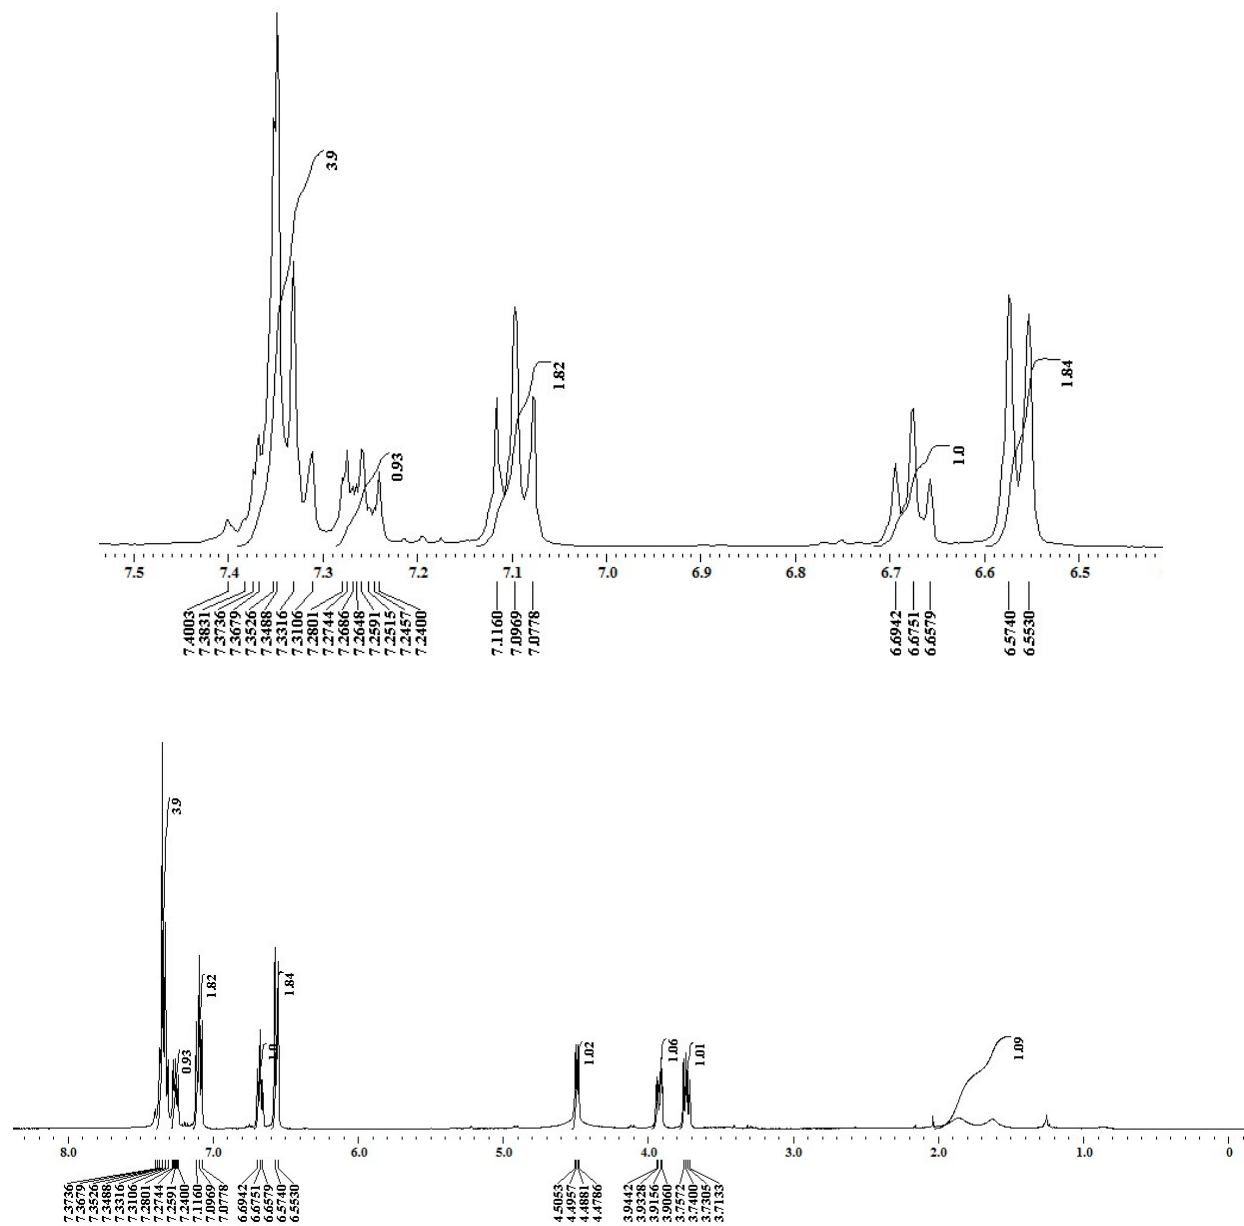

Figure S18. <sup>1</sup>H NMR spectrum of 2-Phenyl-2-(phenylamino)ethanol in CDCl<sub>3</sub>.

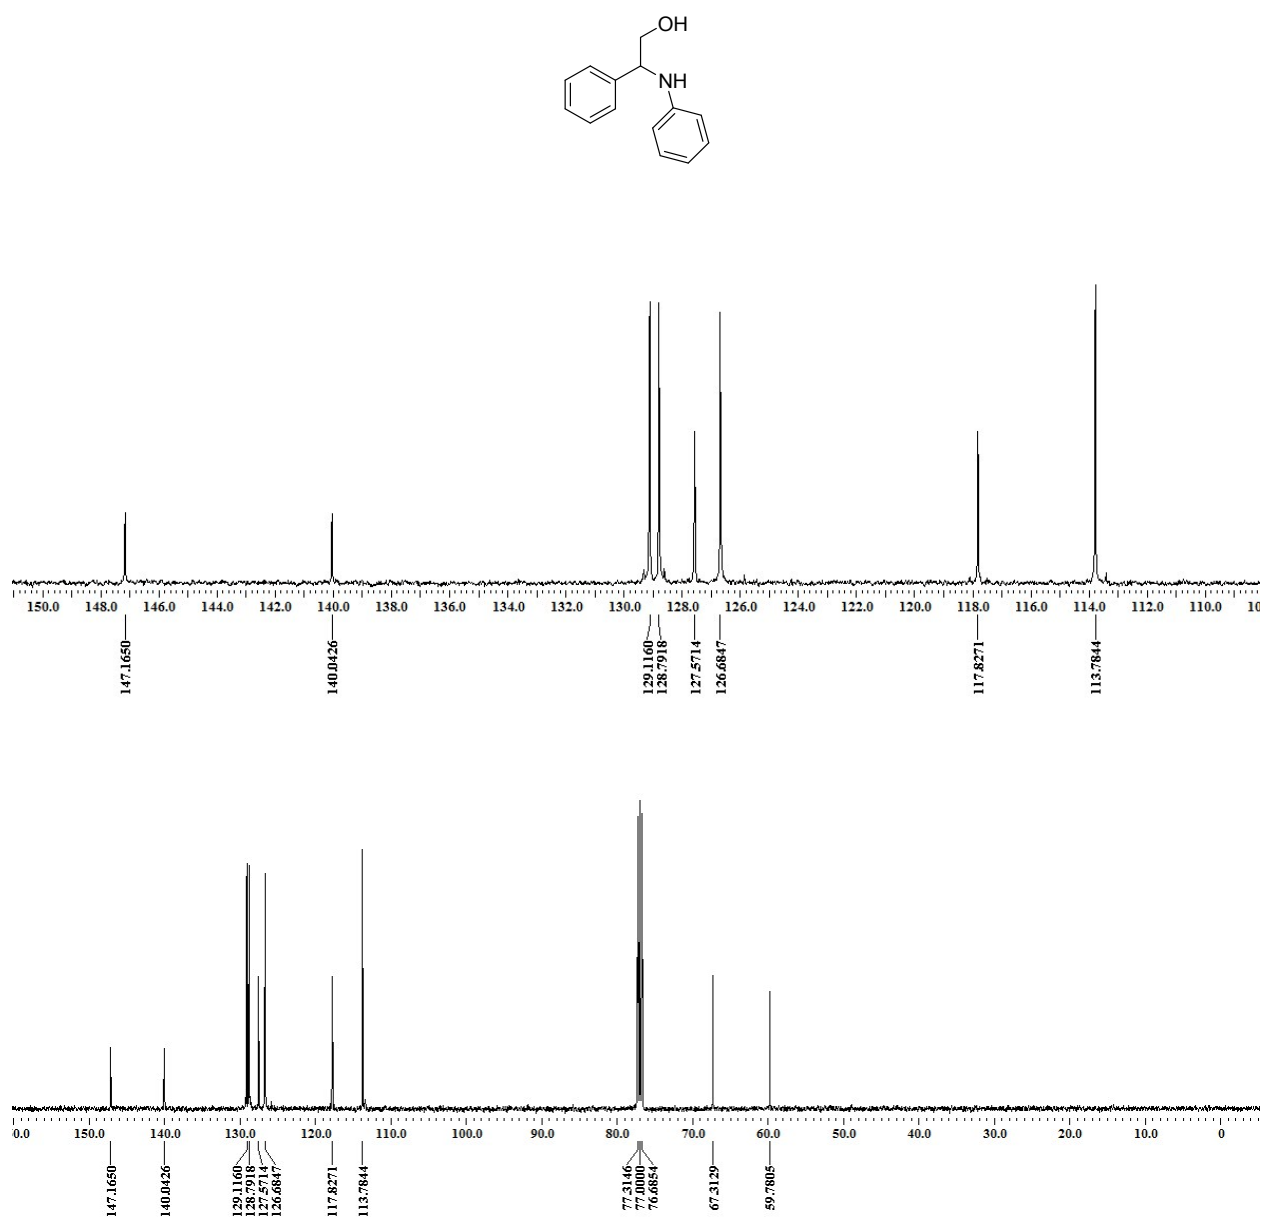

Figure S19.  $^{13}\text{C}$  NMR spectrum of 2-Phenyl-2-(phenylamino)ethanol in  $\text{CDCl}_3$ .

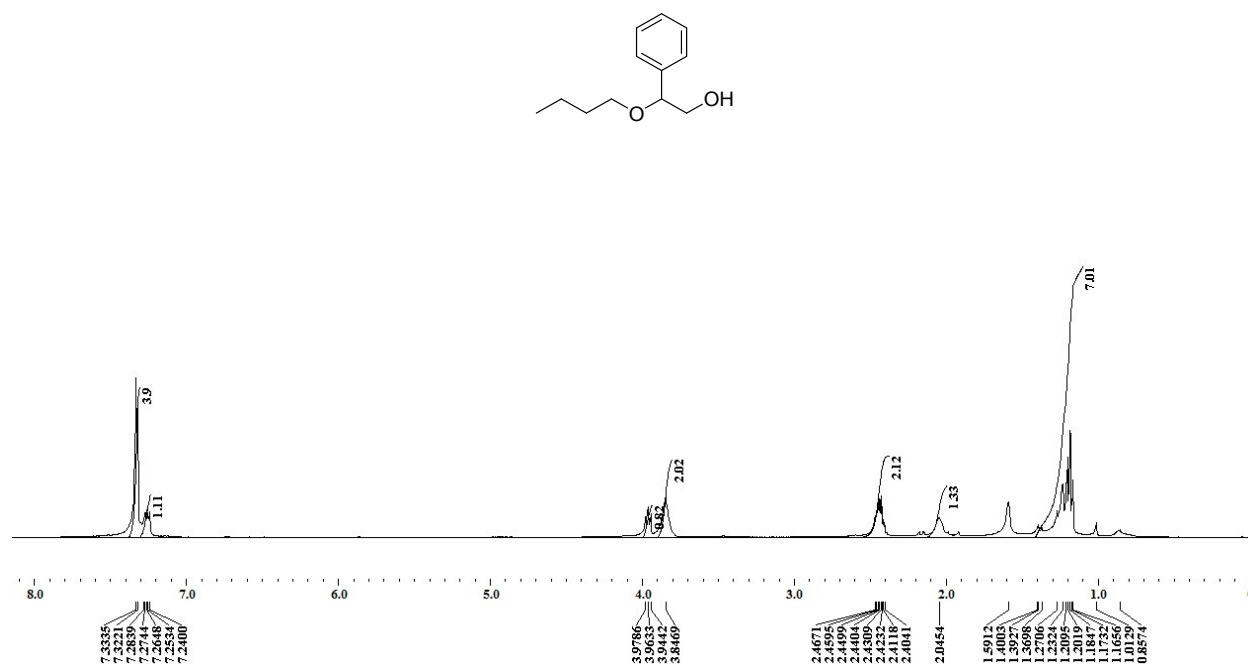

Figure S20. <sup>1</sup>H NMR spectrum of 2-Butoxy-2-phenylethanol in CDCl<sub>3</sub>.

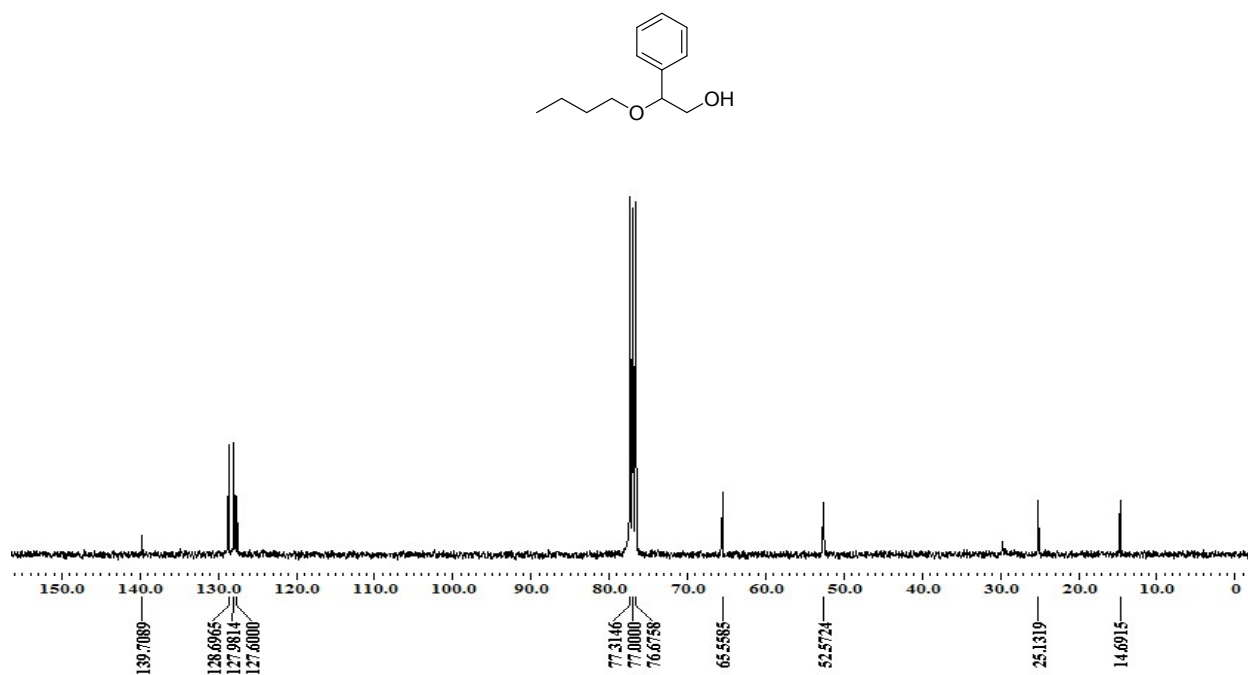

Figure S21. <sup>13</sup>C NMR spectrum of 2-butoxy-2-phenylethanol in CDCl<sub>3</sub>.

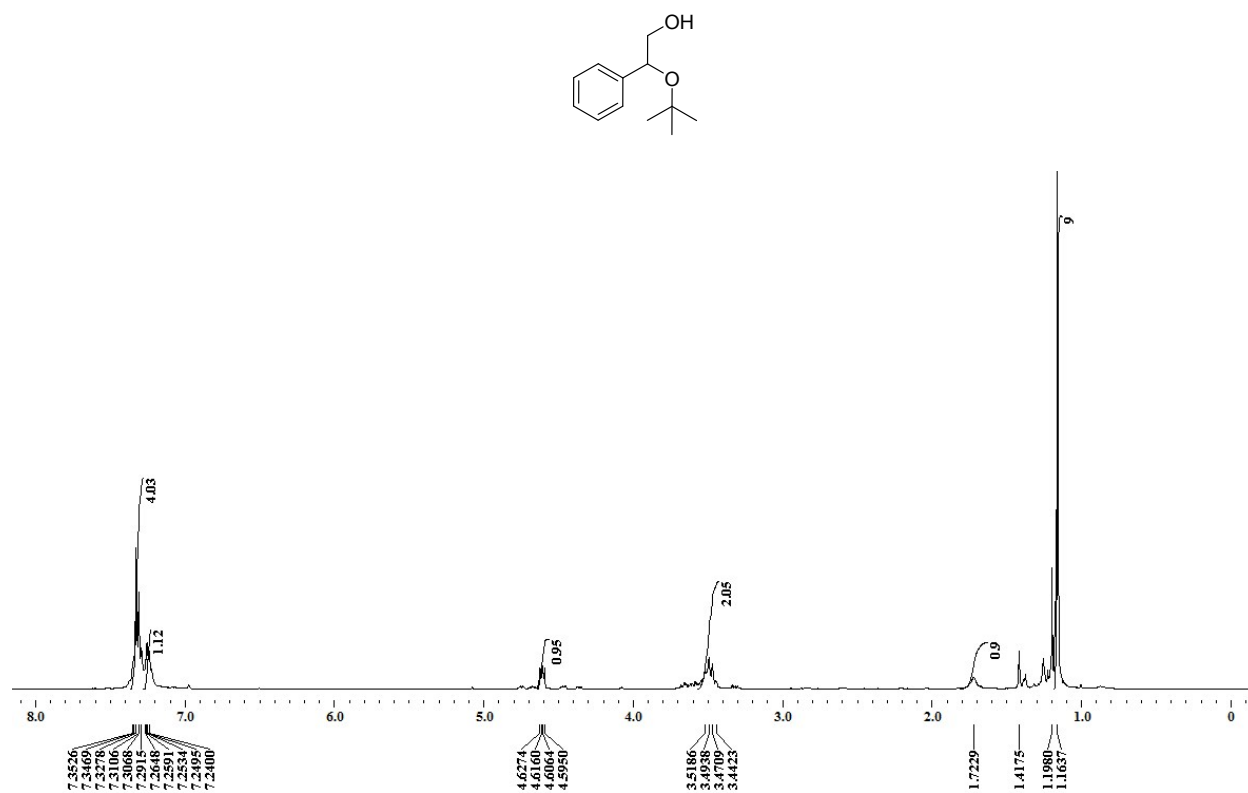

Figure S22. <sup>1</sup>H NMR spectrum of 2-(tert-Butoxy)-2-phenylethanol in CDCl<sub>3</sub>.

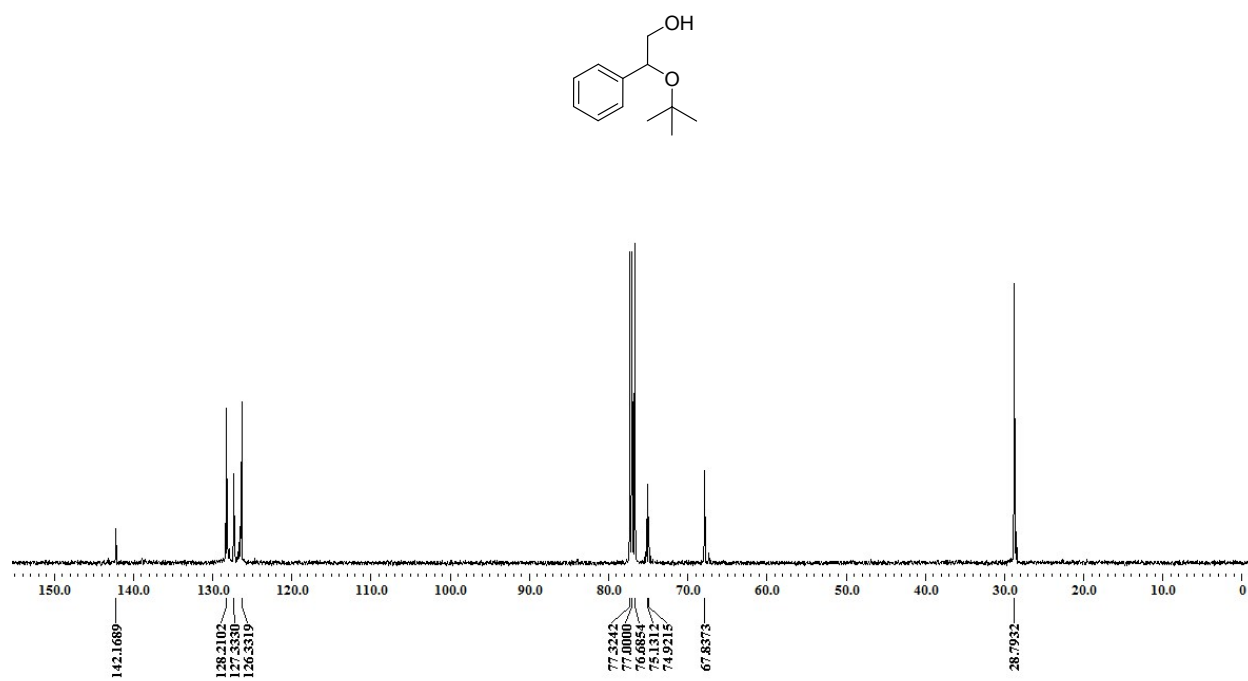

Figure S23. <sup>13</sup>C NMR spectrum of 2-(tert-Butoxy)-2-phenylethanol in CDCl<sub>3</sub>.

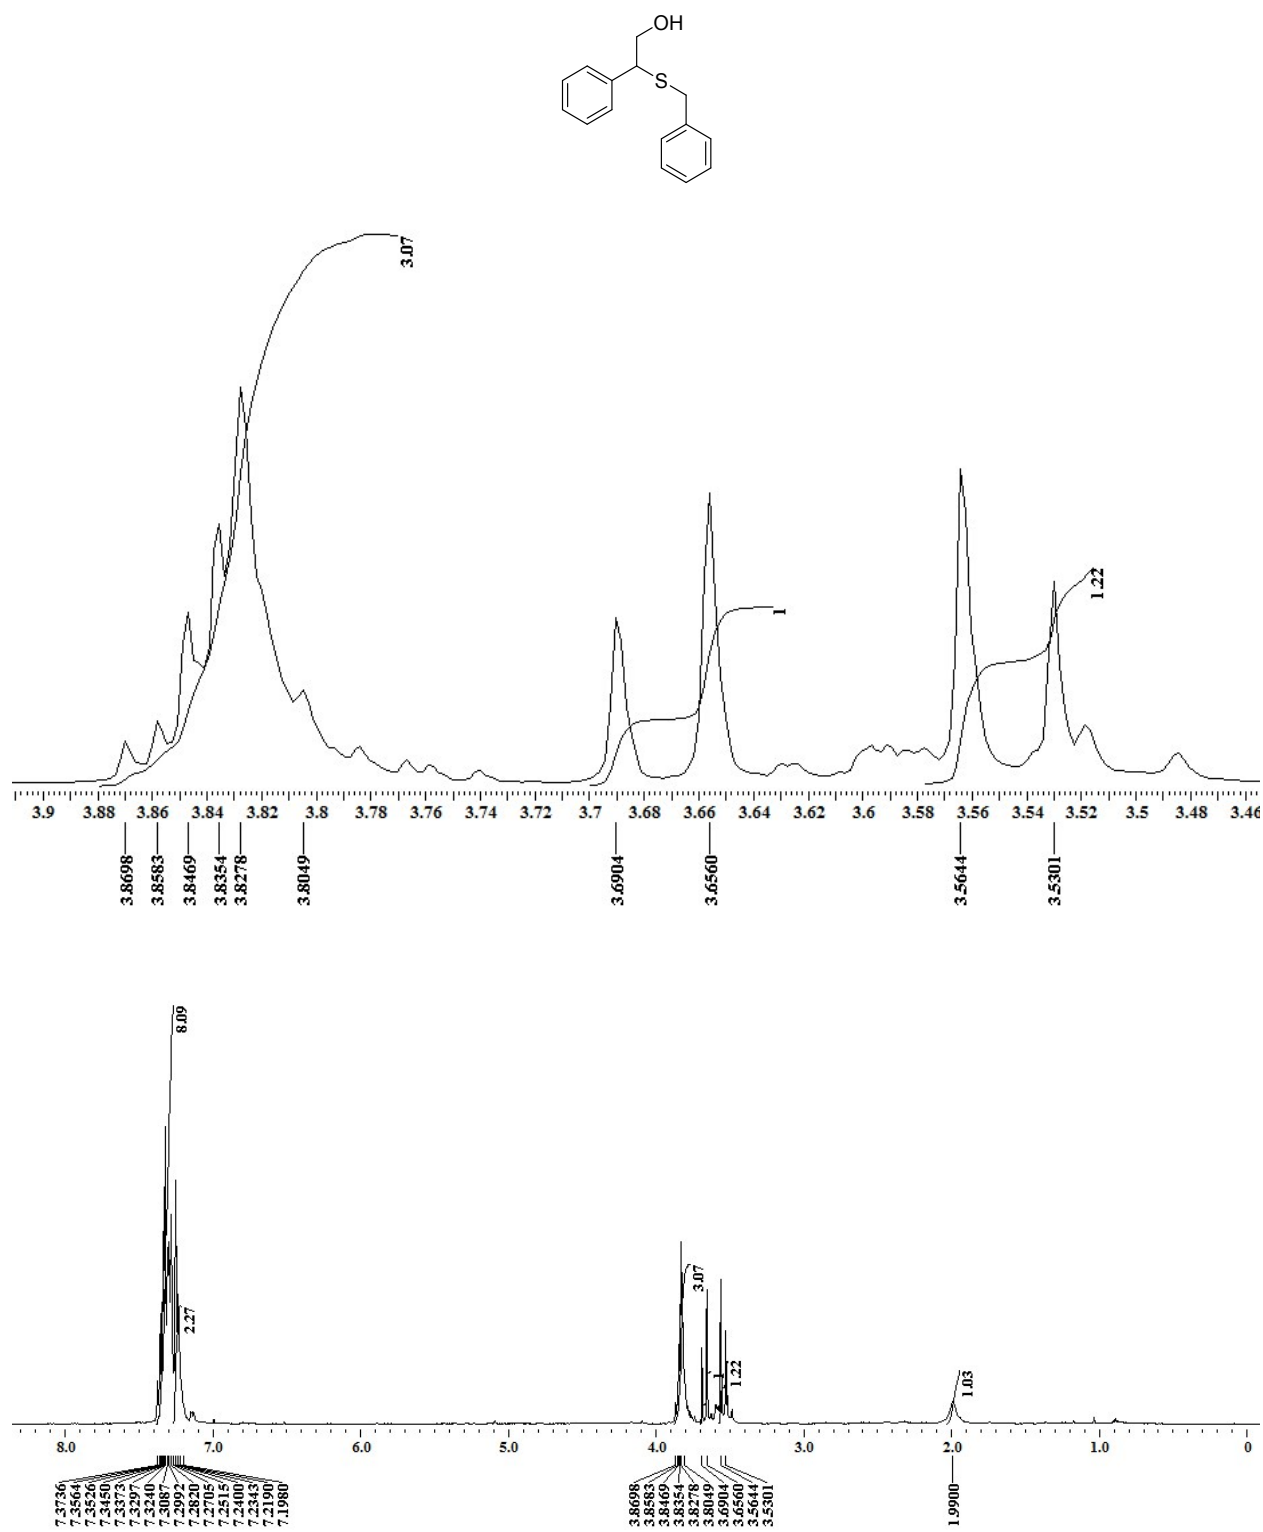

Figure S24.  $^1\text{H}$  NMR spectrum of 2-(benzylthio)-2-phenylethanol in  $\text{CDCl}_3$ .

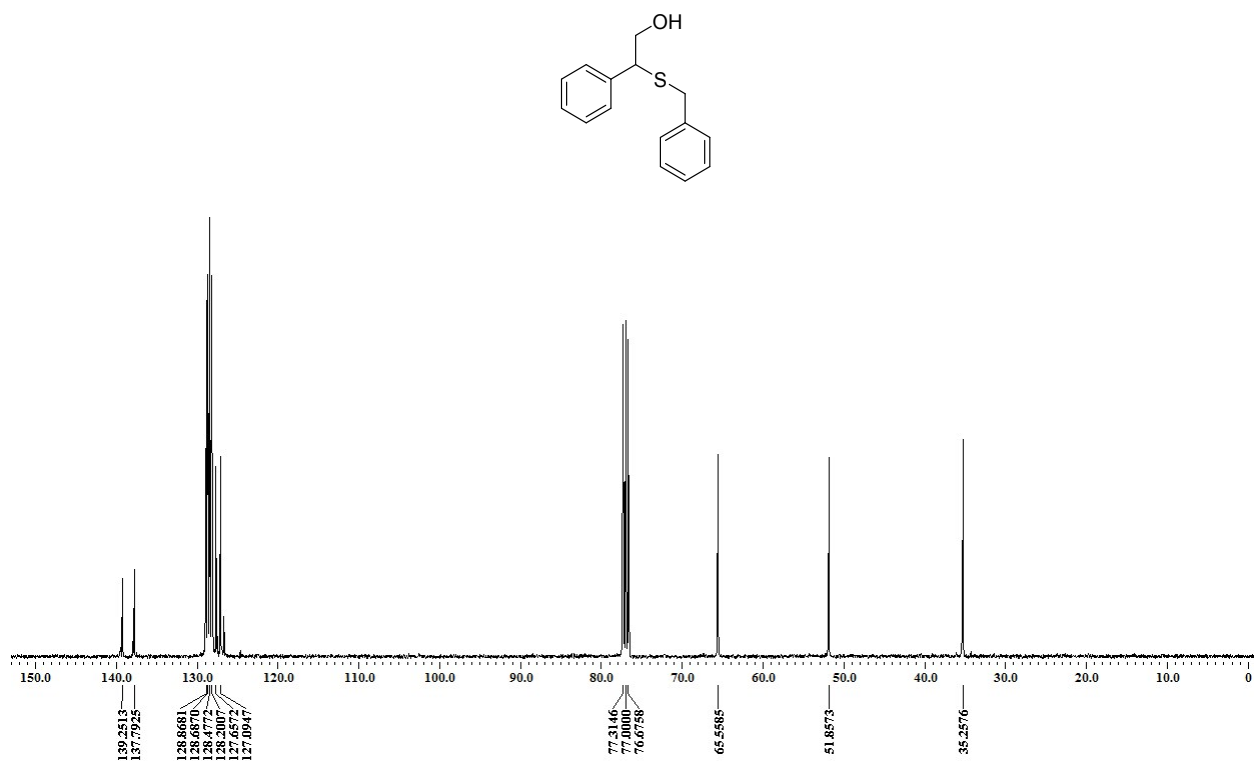

Figure S25. <sup>13</sup>C NMR spectrum of 2-(Benzylthio)-2-phenylethanol in CDCl<sub>3</sub>.

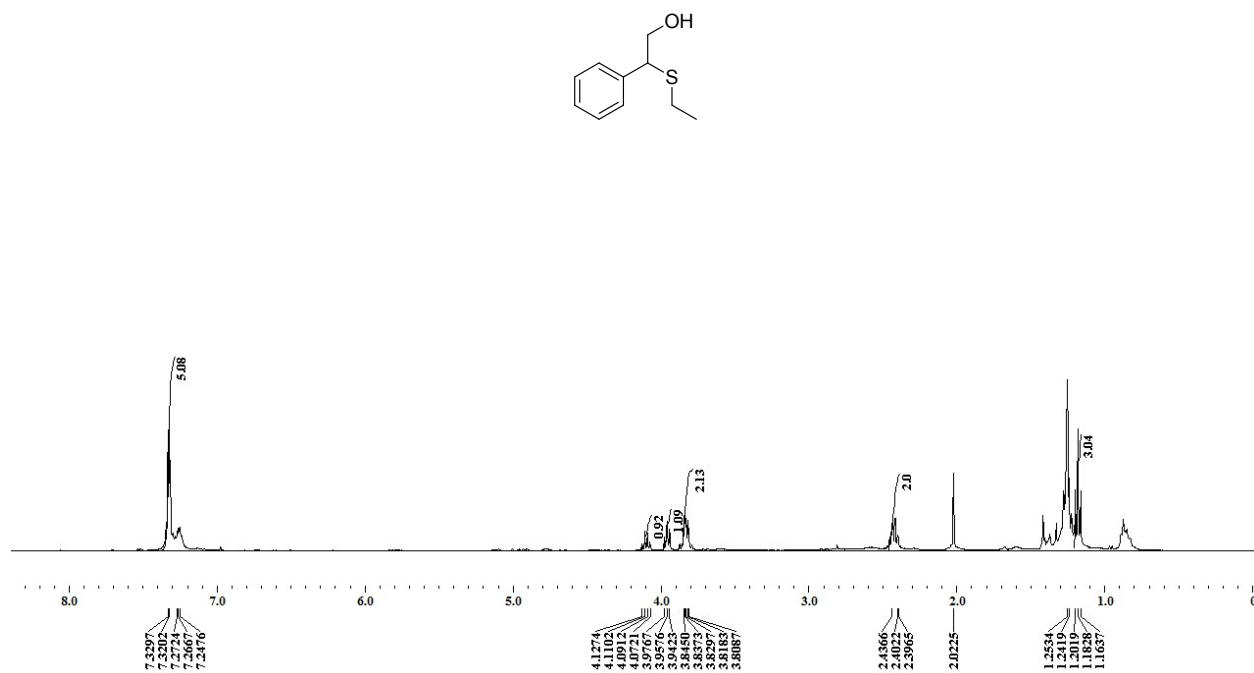

Figure S26. <sup>1</sup>H NMR spectrum of 2-(Ethylthio)-2-phenylethanol in CDCl<sub>3</sub>.

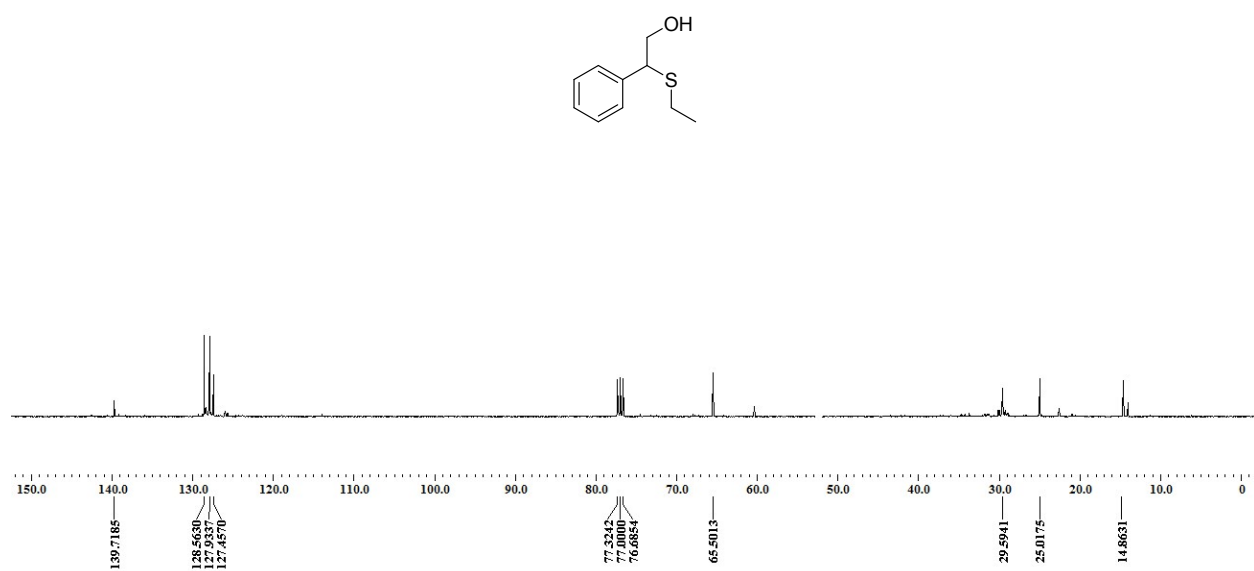

Figure S27.  $^{13}\text{C}$  NMR spectrum of 2-(Ethylthio)-2-phenylethanol in  $\text{CDCl}_3$ .

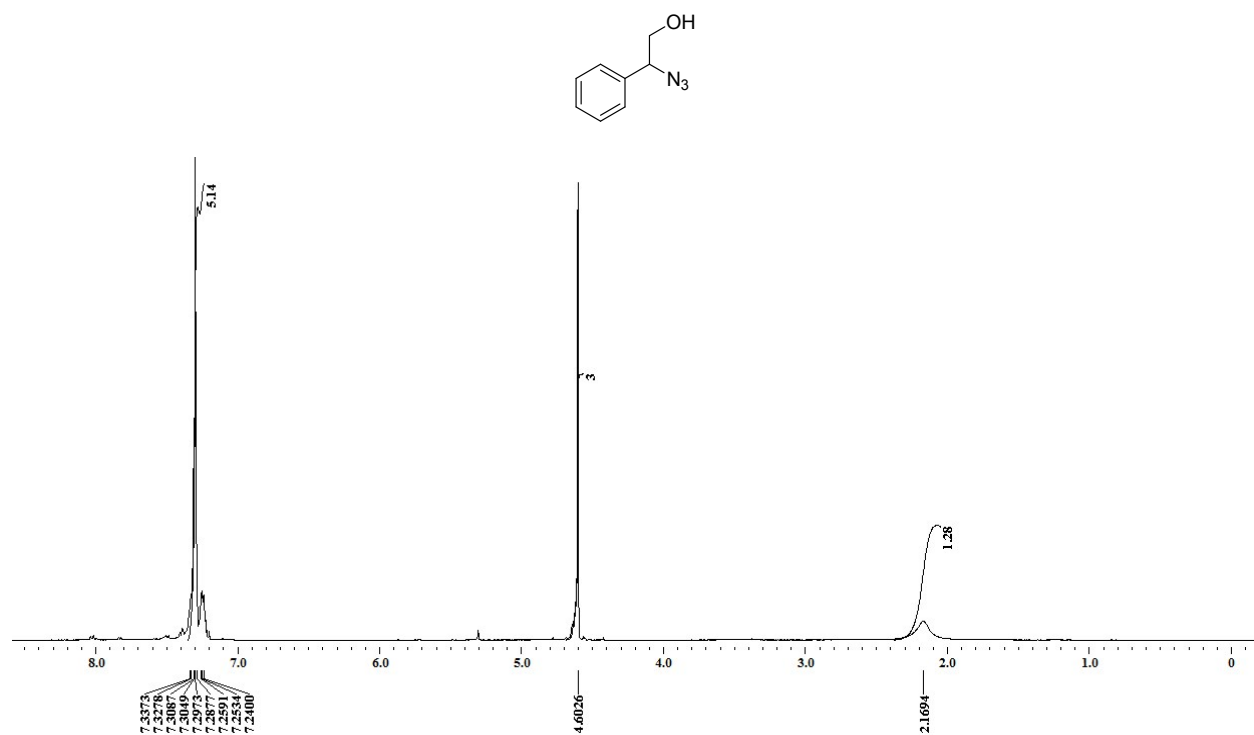

Figure S28.  $^1\text{H}$  NMR spectrum of 2-Azido-2-phenylethanol in  $\text{CDCl}_3$ .

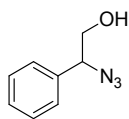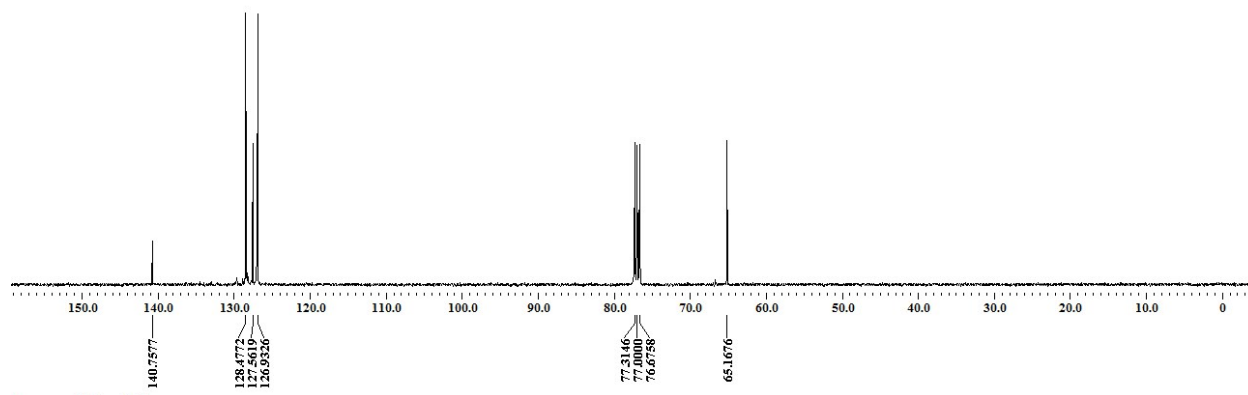

Figure S29. <sup>13</sup>C NMR spectrum of 2-Azido-2-phenylethanol in CDCl<sub>3</sub>.

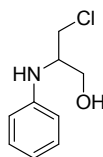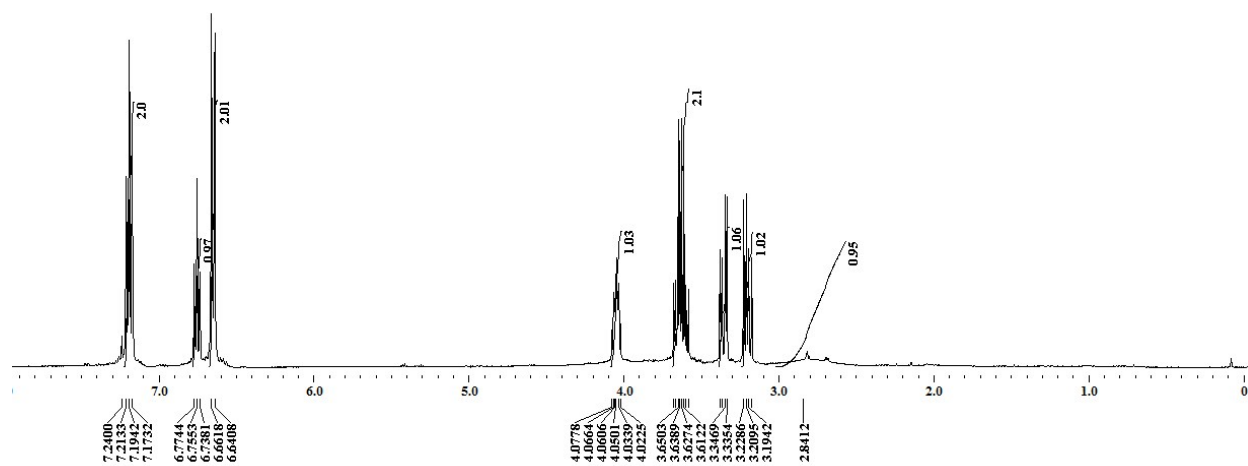

Figure S30. <sup>1</sup>H NMR spectrum of 3-Chloro-2-(phenylamino)propan-1-ol in CDCl<sub>3</sub>.

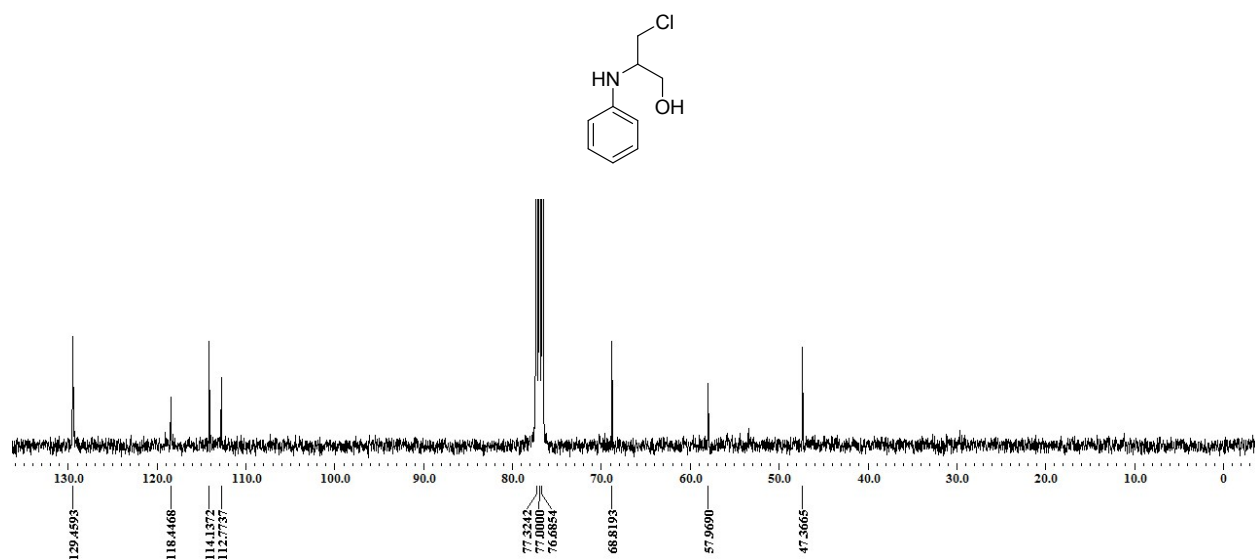

Figure S31. <sup>13</sup>C NMR spectrum of 3-Chloro-2-(phenylamino)propan-1-ol in CDCl<sub>3</sub>.

Table S1. H-bonding distances for **1-Eu**.

| Hydrogen bonding synthon | Separation (Å) | Hydrogen bonding synthon | Separation (Å) |
|--------------------------|----------------|--------------------------|----------------|
| O1....O7w                | 2.812          | O8w....O11w              | 2.836          |
| O7w....O8                | 2.852          | O11w....O9               | 2.896          |
| O2....O8w                | 2.786          | O5....O12w               | 2.703          |
| O8w....O1                | 2.701          | O12w....O2               | 2.722          |

Table S2. H-bonding distances for **1-Tb**.

| Hydrogen bonding synthon | Separation (Å) | Hydrogen bonding synthon | Separation (Å) |
|--------------------------|----------------|--------------------------|----------------|
| O2.....O14W              | 2.826          | O5.....O13W              | 2.666          |
| O3.....O14W              | 3.014          | O6.....O16W              | 2.914          |
| O10.....O1W              | 2.709          | O16W.....O17W            | 2.843          |
| O1W.....O10W             | 2.834          | O10W.....O17W            | 2.843          |
| O4.....O10W              | 2.836          | O4.....O10W              | 2.836          |
| O8.....O5W               | 2.798          | O8W.....O17W             | 2.719          |
| O13W.....O14W            | 2.837          | O3.....O8W               | 2.762          |
| O11W.....O13W            | 2.849          | O4W.....O12W             | 2.721          |
| O2W.....O11W             | 2.901          | O4W.....O8               | 2.927          |
| O2.....O11W              | 2.715          | O12W.....O13W            | 3.001          |
| O3.....O12W              | 2.708          | O4W.....O12W             | 2.721          |

Table S3. Retention time of the organic products as observed from the gas chromatographic experiments.<sup>a</sup>

| Entry | Product                                                                             | Retention time (Min.) |
|-------|-------------------------------------------------------------------------------------|-----------------------|
| 1     | 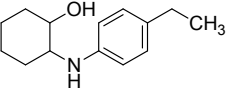   | 27.0                  |
| 2     | 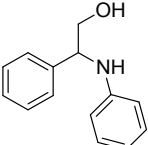   | 24.2                  |
| 3     | 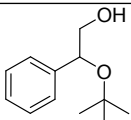   | 16.6                  |
| 4     | 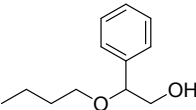   | 19.7                  |
| 5     | 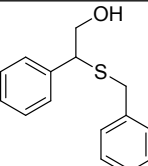  | 29.2                  |
| 6     | 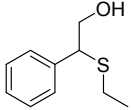 | 25.7                  |
| 7     | 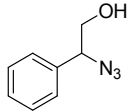 | 20.8                  |
| 8     | 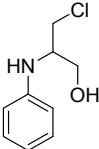 | 22.8                  |

<sup>a</sup>The products were analyzed by the Perkin Elmer Clarus 580 gas chromatograph equipped with an auto injector, a flame ionization detector and an Elite 5 column (0.25 mm ID, 30 meter). Conditions: nitrogen as the carrier gas with 2 ml/min flow rate; injection volume 1.0  $\mu$ L; and detector temperature 250 °C. The oven temperature was programmed initially heating at 50 °C for 5 min, followed by heating to 120 °C at 10 °C/min (hold for 5 min), then to 200 °C at 10 °C/min (hold for 5 min) and finally to 300 °C (hold for 3 min) with the total analysis time of ca. 40 min.
